# Supplementary material for: Redefining the ancestral origins of the interleukin-1 superfamily
Source: PubMed Central journal article supplement (PMC5861070; doi:10.1038/s41467-018-03362-1), 2018-03-20
Supplement: 41467_2018_3362_MOESM3_ESM.pdf [file 41467_2018_3362_MOESM3_ESM.pdf]

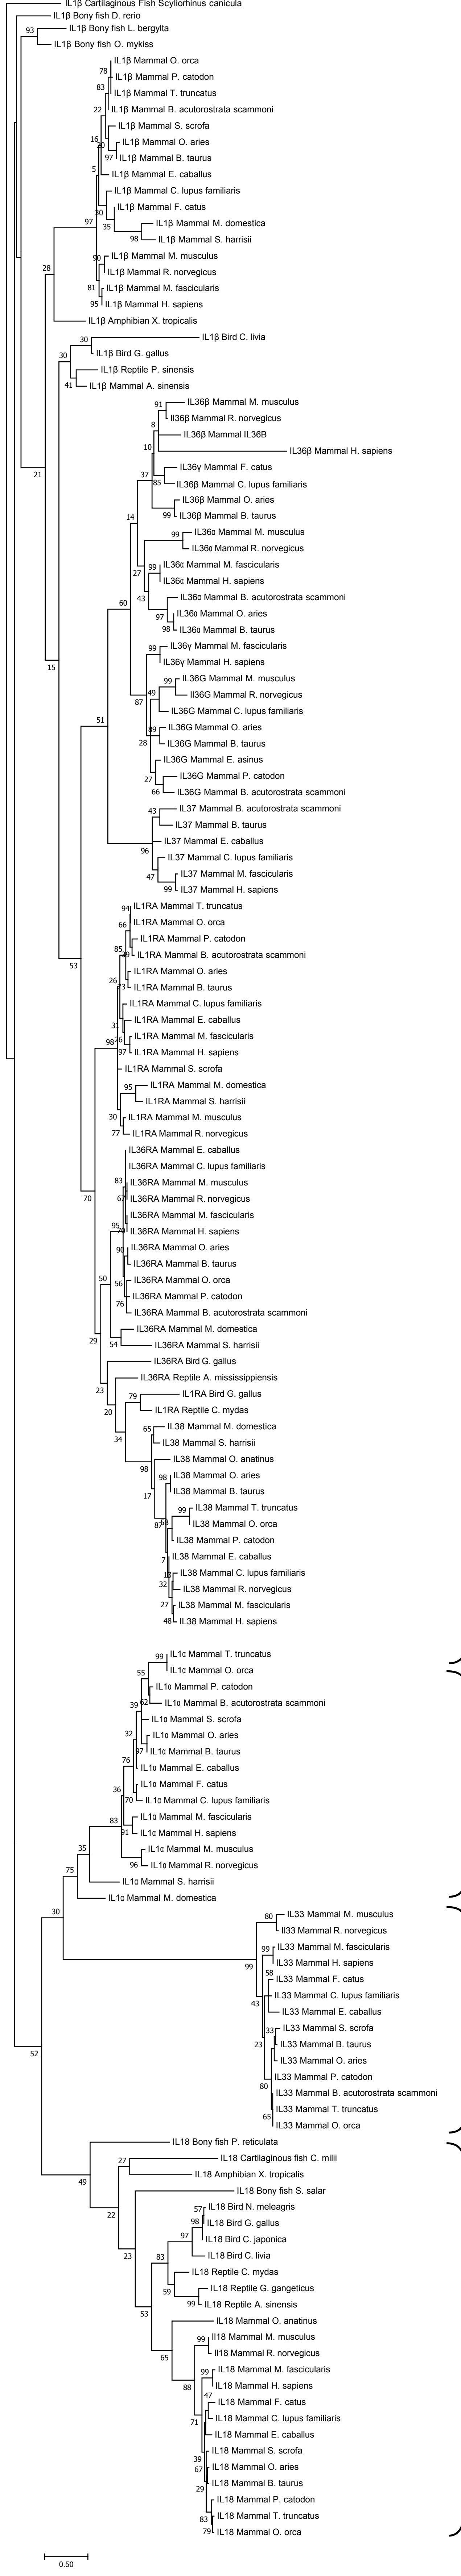

IL-1β, IL-1RA, IL-36\*, IL-37, IL-38 Cluster

IL-1α

IL-33

IL-18

0.50
