# Supplementary material for: Redefining the ancestral origins of the interleukin-1 superfamily
Source: PubMed Central journal article supplement (PMC5861070; doi:10.1038/s41467-018-03362-1), 2018-03-20
Supplement: 41467_2018_3362_MOESM10_ESM.pdf [file 41467_2018_3362_MOESM10_ESM.pdf]

| Taxa                                | Gene ID   | RefSeq status | Clade              |
|-------------------------------------|-----------|---------------|--------------------|
| <b>IL1A</b>                         |           |               |                    |
| Homo sapien                         | 147760    | Reviewed      | Mammal             |
| Macaca fascicularis                 | 101926546 | Provisional   | Mammal             |
| Bos taurus                          | 281250    | Provisional   | Mammal             |
| Rattus norvegicus                   | 24493     | Provisional   | Mammal             |
| Canis lupus familiaris              | 403782    | Provisional   | Mammal             |
| Equus caballus                      | 100064969 | Validated     | Mammal             |
| Mus musculus                        | 16175     | Model         | Mammal             |
| Sus scrofa                          | 397094    | Model         | Mammal             |
| Ovis Aries                          | 443404    | Provisional   | Mammal             |
| Felis catus                         | 493944    | Provisional   | Mammal             |
| Ornithorhynchus anatinus            | NA        |               | Mammal             |
| Sarcophilus harrisii                | 105749132 | Model         | Mammal             |
| Monodelphis domestica               | 103105940 | Model         | Mammal             |
| Balaenoptera acutorostrata scammoni | 103008155 | Model         | Mammal             |
| Physeter catodon                    | 102993910 | Model         | Mammal             |
| Orcinus orca                        | 101272616 | Model         | Mammal             |
| Tursiops truncatus                  | 101319101 | Model         | Mammal             |
| Delphinapterus leucas               | 11187501  | Model         | Mammal             |
| Alligator mississippiensis          | NA        |               | Reptile            |
| Gavialis gangeticus                 | NA        |               | Reptile            |
| Chelonia mydas                      | NA        |               | Reptile            |
| Xenopus tropicalis                  | NA        |               | Amphibian          |
| Nanorana parkeri                    | NA        |               | Amphibian          |
| Gallus gallus                       | NA        |               | Bird               |
| Columba ivia                        | NA        |               | Bird               |
| Coturnix japonica                   | NA        |               | Bird               |
| Numida meleagris                    | NA        |               | Bird               |
| Danio rerio                         | NA        |               | Bony fish          |
| Cyprinus carpio                     | NA        |               | Bony fish          |
| Mesocricetus auratus                | NA        |               | Bony Fish          |
| Oncorhynchus mykiss                 | NA        |               | Bony fish          |
| Callorhynchus Milii                 | NA        |               | Cartilaginous fish |
| Salmo salar                         | NA        |               | Bony fish          |
| Cyprinus carpio                     | NA        |               | Bony Fish          |
| Labrus bergylta                     | NA        |               | Bony Fish          |
| Scyliorhinus canicula               | NA        |               | Cartilaginous fish |

| <b>IL1B</b>            |           |             |        |
|------------------------|-----------|-------------|--------|
| Homo sapiens           | 3553      | Reviewed    | Mammal |
| Macaca fascicularis    | 102119749 | Validated   | Mammal |
| Bos taurus             | 281251    | Provisional | Mammal |
| Rattus norvegicus      | 2891      | Provisional | Mammal |
| Canis lupus familiaris | 403974    | Model       | Mammal |
| Equus caballus         | 100052414 | Provisional | Mammal |
| Mus musculus           | 16176     | Reviewed    | Mammal |

|                                     |           |             |                    |
|-------------------------------------|-----------|-------------|--------------------|
| Sus scrofa                          | 397122    | Provisional | Mammal             |
| Ovis Aries                          | 443539    | Provisional | Mammal             |
| Felis catus                         | 768274    | Provisional | Mammal             |
| Sarcophilus harrisii                | 100922350 | Model       | Mammal             |
| Monodelphis domestica               | 100026024 | Model       | Mammal             |
| Balaenoptera acutorostrata scammoni | 103008438 | Model       | Mammal             |
| Physeter catodon                    | 102994188 | Model       | Mammal             |
| Orcinus orca                        | 101284892 | Model       | Mammal             |
| Tursiops truncatus                  | 101318809 | Model       | Mammal             |
| Alligator sinensis                  | 102369595 | Model       | Reptile            |
| Pelodiscus sinensis                 | 102448244 | Provisional | Reptile            |
| Chelonia mydas                      | NA        |             | Reptile            |
| Xenopus tropicalis                  | 100487038 | Model       | Amphibian          |
| Nanorana parkeri                    | NA        | Model       | Amphibian          |
| Gallus gallus                       | 395196    | Model       | Bird               |
| Columba Livia                       | 102090585 | Model       | Bird               |
| Coturnix japonica                   | NA        | Model       | Bird               |
| Numida meleagris                    | NA        | Model       | Bird               |
| Danio rerio                         | 405770    | Validated   | Bony fish          |
| Cyprinodon variegatus               | NA        |             | Bony fish          |
| Poecilia formosa                    | NA        |             | Bony fish          |
| Oncorhynchus mykiss                 | 100136024 | Provisional | Bony fish          |
| Callorhynchus Milii                 | NA        |             | Cartilaginous fish |
| Salmo salar                         | NA        |             | Bony fish          |
| Cyprinus carpio                     | NA        |             | Bony fish          |
| Labrus bergylta                     | 109997024 | Model       | Bony fish          |
| Scyliorhinus canicula               | 10241835  | Model       | Cartilaginous fish |

|             |
|-------------|
| <b>IL18</b> |
|-------------|

|                                     |           |             |           |
|-------------------------------------|-----------|-------------|-----------|
| Homo sapiens                        | 3606      | Model       | Mammal    |
| Macaca fascicularis                 | 102135101 | Model       | Mammal    |
| Bos taurus                          | 281249    | Model       | Mammal    |
| Rattus norvegicus                   | 2889      | PROVISIONAL | Mammal    |
| Canis lupus familiaris              | 403796    | Model       | Mammal    |
| Equus caballus                      | 100034216 | Model       | Mammal    |
| Mus musculus                        | 16173     | REVIEWED    | Mammal    |
| Sus scrofa                          | 397057    | PROVISIONAL | Mammal    |
| Ovis Aries                          | 443206    | Model       | Mammal    |
| Felis catus                         | 493688    | Model       | Mammal    |
| Ornithorhynchus anatinus            | 100083773 | Model       | Mammal    |
| Sarcophilus harrisii                | NA        | Model       | Mammal    |
| Monodelphis domestica               | NA        | Model       | Mammal    |
| Balaenoptera acutorostrata scammoni | NA        | Model       | Mammal    |
| Physeter catodon                    | 102976313 | Model       | Mammal    |
| Orcinus orca                        | 101271274 | Model       | Mammal    |
| Tursiops truncatus                  | 101334331 | Model       | Mammal    |
| Alligator mississippiensis          | 102369831 | Model       | Reptile   |
| Gavialis gangeticus                 | 109292958 | Model       | Reptile   |
| Chelonia mydas                      | 102933793 | Model       | Reptile   |
| Xenopus tropicalis                  | 108648098 | Model       | Amphibian |

|                       |           |             |                    |
|-----------------------|-----------|-------------|--------------------|
| Nanorana parkeri      | NA        | Model       | Amphibian          |
| Gallus gallus         | 395312    | Model       | Bird               |
| Columba Livia         | 102093971 | Model       | Bird               |
| Coturnix japonica     | 107324129 | Model       | Bird               |
| Numida meleagris      | 110387565 | Model       | Bird               |
| Danio rerio           | NA        | Model       | Bony fish          |
| Cyprinodon variegatus | NA        | Model       | Bony fish          |
| Poecilia reticulata   | 103474370 | Model       | Bony fish          |
| Oncorhynchus mykiss   | NA        | Model       | Bony fish          |
| Callorhynchus Mili    | 103191153 | Model       | Cartilaginous fish |
| Salmo salar           | 100196379 | PROVISIONAL | Bony fish          |
| Cyprinus carpio       | NA        | Model       | Bony fish          |
| Labrus bergylta       | NA        | Model       | Bony fish          |
| Scyliorhinus canicula | NA        |             | Cartilaginous fish |

### IL33

|                                     |           |             |                    |
|-------------------------------------|-----------|-------------|--------------------|
| Homo sapiens                        | 608678    | Model       | Mammal             |
| Macaca fascicularis                 | 102140695 | Model       | Mammal             |
| Bos taurus                          | 507054    | Model       | Mammal             |
| Rattus norvegicus                   | 1311155   | Provisional | Mammal             |
| Canis lupus familiaris              | 403810    | Model       | Mammal             |
| Equus caballus                      | 100059908 | Model       | Mammal             |
| Mus musculus                        | 77125     | Validated   | Mammal             |
| Sus scrofa                          | 100518643 | Model       | Mammal             |
| Ovis Aries                          | 101116705 | Model       | Mammal             |
| Felis catus                         | 101093403 | Model       | Mammal             |
| Ornithorhynchus anatinus            | NA        |             | Mammal             |
| Sarcophilus harrisii                | NA        |             | Mammal             |
| Monodelphis domestica               | NA        |             | Mammal             |
| Balaenoptera acutorostrata scammoni | 103011945 | Model       | Mammal             |
| Physeter catodon                    | 102989473 | Model       | Mammal             |
| Orcinus orca                        | 101277857 | Model       | Mammal             |
| Tursiops truncatus                  | 101319264 | Model       | Mammal             |
| Alligator mississippiensis          | NA        |             | Reptile            |
| Gavialis gangeticus                 | NA        |             | Reptile            |
| Chelonia mydas                      | NA        |             | Reptile            |
| Xenopus tropicalis                  | NA        |             | Amphibian          |
| Nanorana parkeri                    | NA        |             | Amphibian          |
| Gallus gallus                       | NA        |             | Bird               |
| Columba Livia                       | NA        |             | Bird               |
| Coturnix japonica                   | NA        |             | Bird               |
| Numida meleagris                    | NA        |             | Bird               |
| Danio rerio                         | NA        |             | Bony fish          |
| Cyprinodon variegatus               | NA        |             | Bony fish          |
| Poecilia formosa                    | NA        |             | Bony fish          |
| Oncorhynchus mykiss                 | NA        |             | Bony fish          |
| Callorhynchus Mili                  | NA        |             | Cartilaginous fish |
| Salmo salar                         | NA        |             | Bony fish          |
| Cyprinus carpio                     | NA        |             | Bony fish          |
| Labrus bergylta                     | NA        |             | Bony fish          |

Scyliorhinus canicula

NA

Cartilaginous fish

**IL36A**

|                                     |           |             |                    |
|-------------------------------------|-----------|-------------|--------------------|
| Homo sapiens                        | 605509    | Model       | Mammal             |
| Macaca fascicularis                 | 102123034 | Model       | Mammal             |
| Bos taurus                          | 523429    | Model       | Mammal             |
| Rattus norvegicus                   | 1306869   | Provisional | Mammal             |
| Canis lupus familiaris              | NA        |             | Mammal             |
| Equus caballus                      | NA        |             | Mammal             |
| Mus musculus                        | 1859324   | Provisional | Mammal             |
| Sus scrofa                          | NA        |             | Mammal             |
| Ovis Aries                          | 101106251 | Model       | Mammal             |
| Felis catus                         | NA        |             | Mammal             |
| Ornithorhynchus anatinus            | NA        |             | Mammal             |
| Sarcophilus harrisii                | NA        |             | Mammal             |
| Monodelphis domestica               | NA        |             | Mammal             |
| Balaenoptera acutorostrata scammoni | 103019938 | Model       | Mammal             |
| Physeter catodon                    | NA        |             | Mammal             |
| Orcinus orca                        | NA        |             | Mammal             |
| Tursiops truncatus                  | NA        |             | Mammal             |
| Alligator mississippiensis          | NA        |             | Reptile            |
| Gavialis gangeticus                 | NA        |             | Reptile            |
| Chelonia mydas                      | NA        |             | Reptile            |
| Xenopus tropicalis                  | NA        |             | Amphibian          |
| Nanorana parkeri                    | NA        |             | Amphibian          |
| Gallus gallus                       | NA        |             | Bird               |
| Columba Livia                       | NA        |             | Bird               |
| Coturnix japonica                   | NA        |             | Bird               |
| Numida meleagris                    | NA        |             | Bird               |
| Danio rerio                         | NA        |             | Bony fish          |
| Cyprinodon variegatus               | NA        |             | Bony fish          |
| Poecilia formosa                    | NA        |             | Bony fish          |
| Oncorhynchus mykiss                 | NA        |             | Bony fish          |
| Callorhynchus Milii                 | NA        |             | Cartilaginous fish |
| Salmo salar                         | NA        |             | Bony fish          |
| Cyprinus carpio                     | NA        |             | Bony fish          |
| Labrus bergylta                     | NA        |             | Bony fish          |
| Scyliorhinus canicula               | NA        |             | Cartilaginous fish |

**IL36B**

|                        |           |             |        |
|------------------------|-----------|-------------|--------|
| Homo sapiens           | 27177     | Reviewed    | Mammal |
| Macaca fascicularis    | NA        |             | Mammal |
| Bos taurus             | 100297786 | Model       | Mammal |
| Rattus norvegicus      | 1307847   | Model       | Mammal |
| Canis lupus familiaris | 483068    | Model       | Mammal |
| Equus asinus           | 100065096 | Model       | Mammal |
| Mus musculus           | 69677     | Provisional | Mammal |
| Sus scrofa             | NA        |             | Mammal |
| Ovis Aries             | 101105996 | Model       | Mammal |
| Felis catus            | NA        |             | Mammal |

|                                     |    |                    |
|-------------------------------------|----|--------------------|
| Ornithorhynchus anatinus            | NA | Mammal             |
| Sarcophilus harrisii                | NA | Mammal             |
| Monodelphis domestica               | NA | Mammal             |
| Balaenoptera acutorostrata scammoni | NA | Mammal             |
| Physeter catodon                    | NA | Mammal             |
| Orcinus orca                        | NA | Mammal             |
| Tursiops truncatus                  | NA | Mammal             |
| Alligator mississippiensis          | NA | Reptile            |
| Gavialis gangeticus                 | NA | Reptile            |
| Chelonia mydas                      | NA | Reptile            |
| Xenopus tropicalis                  | NA | Amphibian          |
| Nanorana parkeri                    | NA | Amphibian          |
| Gallus gallus                       | NA | Bird               |
| Columba Livia                       | NA | Bird               |
| Coturnix japonica                   | NA | Bird               |
| Numida meleagris                    | NA | Bird               |
| Danio rerio                         | NA | Bony fish          |
| Cyprinodon variegatus               | NA | Bony fish          |
| Poecilia formosa                    | NA | Bony fish          |
| Oncorhynchus mykiss                 | NA | Bony fish          |
| Callorhynchus Mili                  | NA | Cartilaginous fish |
| Salmo salar                         | NA | Bony fish          |
| Cyprinus carpio                     | NA | Bony fish          |
| Labrus bergylta                     | NA | Bony fish          |
| Scyliorhinus canicula               | NA | Cartilaginous fish |

|              |
|--------------|
| <b>IL36G</b> |
|--------------|

|                                     |           |             |           |
|-------------------------------------|-----------|-------------|-----------|
| Homo sapiens                        | 56300     | Reviewed    | Mammal    |
| Macaca fascicularis                 | 102121515 | Model       | Mammal    |
| Bos taurus                          | 615762    | Model       | Mammal    |
| Rattus norvegicus                   | 499744    | Provisional | Mammal    |
| Canis lupus familiaris              | 100686137 | Model       | Mammal    |
| Equus asinus                        | 106838560 | Model       | Mammal    |
| Mus musculus                        | 215257    | Validated   | Mammal    |
| Sus scrofa                          | NA        |             | Mammal    |
| Ovis Aries                          | 101106514 | Model       | Mammal    |
| Felis catus                         | 101081377 | Model       | Mammal    |
| Ornithorhynchus anatinus            | NA        |             | Mammal    |
| Sarcophilus harrisii                | NA        |             | Mammal    |
| Monodelphis domestica               | NA        |             | Mammal    |
| Balaenoptera acutorostrata scammoni | 103019653 | Model       | Mammal    |
| Physeter catodon                    | 102979011 | Model       | Mammal    |
| Orcinus orca                        | NA        |             | Mammal    |
| Tursiops truncatus                  | NA        |             | Mammal    |
| Alligator mississippiensis          | NA        |             | Reptile   |
| Gavialis gangeticus                 | NA        |             | Reptile   |
| Chelonia mydas                      | NA        |             | Reptile   |
| Xenopus tropicalis                  | NA        |             | Amphibian |
| Nanorana parkeri                    | NA        |             | Amphibian |
| Gallus gallus                       | NA        |             | Bird      |

|                       |    |                    |
|-----------------------|----|--------------------|
| Columba Livia         | NA | Bird               |
| Coturnix japonica     | NA | Bird               |
| Numida meleagris      | NA | Bird               |
| Danio rerio           | NA | Bony fish          |
| Cyprinodon variegatus | NA | Bony fish          |
| Poecilia formosa      | NA | Bony fish          |
| Oncorhynchus mykiss   | NA | Bony fish          |
| Callorhynchus Milii   | NA | Cartilaginous fish |
| Salmo salar           | NA | Bony fish          |
| Cyprinus carpio       | NA | Bony fish          |
| Labrus bergylta       | NA | Bony fish          |
| Scyliorhinus canicula | NA | Cartilaginous fish |

|             |
|-------------|
| <b>IL37</b> |
|-------------|

|                                     |           |       |                    |
|-------------------------------------|-----------|-------|--------------------|
| Homo sapiens                        | 27178     | Model | Mammal             |
| Macaca fascicularis                 | 102120382 | Model | Mammal             |
| Bos taurus                          | 786493    | Model | Mammal             |
| Rattus norvegicus                   | NA        |       | Mammal             |
| Canis lupus familiaris              | 100686057 | Model | Mammal             |
| Equus caballus                      | 100052470 | Model | Mammal             |
| Mus musculus                        | NA        |       | Mammal             |
| Sus scrofa                          | NA        |       | Mammal             |
| Ovis Aries                          | NA        |       | Mammal             |
| Felis catus                         | NA        |       | Mammal             |
| Ornithorhynchus anatinus            | NA        |       | Mammal             |
| Sarcophilus harrisii                | NA        |       | Mammal             |
| Monodelphis domestica               | NA        |       | Mammal             |
| Balaenoptera acutorostrata scammoni | 103019118 | Model | Mammal             |
| Physeter catodon                    | NA        |       | Mammal             |
| Orcinus orca                        | NA        |       | Mammal             |
| Tursiops truncatus                  | NA        |       | Mammal             |
| Alligator mississippiensis          | NA        |       | Reptile            |
| Gavialis gangeticus                 | NA        |       | Reptile            |
| Chelonia mydas                      | NA        |       | Reptile            |
| Xenopus tropicalis                  | NA        |       | Amphibian          |
| Nanorana parkeri                    | NA        |       | Amphibian          |
| Gallus gallus                       | NA        |       | Bird               |
| Columba Livia                       | NA        |       | Bird               |
| Coturnix japonica                   | NA        |       | Bird               |
| Numida meleagris                    | NA        |       | Bird               |
| Danio rerio                         | NA        |       | Bony fish          |
| Cyprinodon variegatus               | NA        |       | Bony fish          |
| Poecilia formosa                    | NA        |       | Bony fish          |
| Oncorhynchus mykiss                 | NA        |       | Bony fish          |
| Callorhynchus Milii                 | NA        |       | Cartilaginous fish |
| Salmo salar                         | NA        |       | Bony fish          |
| Cyprinus carpio                     | NA        |       | Bony fish          |
| Labrus bergylta                     | NA        |       | Bony fish          |
| Scyliorhinus canicula               | NA        |       | Cartilaginous fish |

**IL38**

|                                     |           |             |                    |
|-------------------------------------|-----------|-------------|--------------------|
| Homo sapiens                        | 615296    | Reviewed    | Mammal             |
| Macaca fascicularis                 | 102125744 | Model       | Mammal             |
| Bos taurus                          | 615702    | Provisional | Mammal             |
| Rattus norvegicus                   | 1305635   | Model       | Mammal             |
| Canis lupus familiaris              | 611873    | Model       | Mammal             |
| Equus caballus                      | 100052532 | Model       | Mammal             |
| Mus musculus                        | NA        |             | Mammal             |
| Sus scrofa                          | NA        |             | Mammal             |
| Ovis Aries                          | 101111084 | Model       | Mammal             |
| Felis catus                         | NA        |             | Mammal             |
| Ornithorhynchus anatinus            | 10092682  | Model       | Mammal             |
| Sarcophilus harrisii                | 100919996 | Model       | Mammal             |
| Monodelphis domestica               | 100013210 | Model       | Mammal             |
| Balaenoptera acutorostrata scammoni | 103009890 | Model       | Mammal             |
| Physeter catodon                    | 102976532 | Model       | Mammal             |
| Orcinus orca                        | 105748873 | Model       | Mammal             |
| Tursiops truncatus                  | 101328728 | Model       | Mammal             |
| Alligator mississippiensis          | NA        |             | Reptile            |
| Gavialis gangeticus                 | NA        |             | Reptile            |
| Chelonia mydas                      | NA        |             | Reptile            |
| Xenopus tropicalis                  | NA        |             | Amphibian          |
| Nanorana parkeri                    | NA        |             | Amphibian          |
| Gallus gallus                       | NA        |             | Bird               |
| Columba Livia                       | NA        |             | Bird               |
| Coturnix japonica                   | NA        |             | Bird               |
| Numida meleagris                    | NA        |             | Bird               |
| Danio rerio                         | NA        |             | Bony fish          |
| Cyprinodon variegatus               | NA        |             | Bony fish          |
| Poecilia formosa                    | NA        |             | Bony fish          |
| Oncorhynchus mykiss                 | NA        |             | Bony fish          |
| Callorhynchus Milii                 | NA        |             | Cartilaginous fish |
| Salmo salar                         | NA        |             | Bony fish          |
| Cyprinus carpio                     | NA        |             | Bony fish          |
| Labrus bergylta                     | NA        |             | Bony fish          |
| Scyliorhinus canicula               | NA        |             | Cartilaginous fish |

**IL1RN**

|                          |           |             |        |
|--------------------------|-----------|-------------|--------|
| Homo sapiens             | 3557      | Reviewed    | Mammal |
| Macaca fascicularis      | 102126145 | Model       | Mammal |
| Bos taurus               | 281860    | Model       | Mammal |
| Rattus norvegicus        | 621159    | Model       | Mammal |
| Canis lupus familiaris   | 403660    | Validated   | Mammal |
| Equus caballus           | 100034236 | Model       | Mammal |
| Mus musculus             | 16181     | Validated   | Mammal |
| Sus scrofa               | 397499    | Provisional | Mammal |
| Ovis Aries               | 780505    | Model       | Mammal |
| Felis catus              | NA        |             | Mammal |
| Ornithorhynchus anatinus | NA        |             | Mammal |
| Sarcophilus harrisii     | 100923652 | Model       | Mammal |

|                                     |           |             |                    |
|-------------------------------------|-----------|-------------|--------------------|
| Monodelphis domestica               | 100026175 | Model       | Mammal             |
| Balaenoptera acutorostrata scammoni | 103010181 | Model       | Mammal             |
| Physeter catodon                    | 102975759 | Model       | Mammal             |
| Orcinus orca                        | 101284384 | Model       | Mammal             |
| Tursiops truncatus                  | 101328434 | Provisional | Mammal             |
| Alligator mississippiensis          | NA        |             | Reptile            |
| Gavialis gangeticus                 | NA        |             | Reptile            |
| Chelonia mydas                      | 102932918 | Model       | Reptile            |
| Xenopus tropicalis                  | NA        |             | Amphibian          |
| Nanorana parkeri                    | NA        |             | Amphibian          |
| Gallus gallus                       | 100861585 | Provisional | Bird               |
| Columba Livia                       | NA        |             | Bird               |
| Coturnix japonica                   | NA        |             | Bird               |
| Numida meleagris                    | NA        |             | Bird               |
| Danio rerio                         | NA        |             | Bony fish          |
| Cyprinodon variegatus               | NA        |             | Bony fish          |
| Poecilia formosa                    | NA        |             | Bony fish          |
| Oncorhynchus mykiss                 | NA        |             | Bony fish          |
| Callorhynchus Milii                 | NA        |             | Cartilaginous fish |
| Salmo salar                         | NA        |             | Bony fish          |
| Cyprinus carpio                     | NA        |             | Bony fish          |
| Labrus bergylta                     | NA        |             | Bony fish          |
| Scyliorhinus canicula               | NA        |             | Cartilaginous fish |

|               |
|---------------|
| <b>IL36RN</b> |
|---------------|

|                                     |           |             |           |
|-------------------------------------|-----------|-------------|-----------|
| Homo sapiens                        | 26525     | Reviewed    | Mammal    |
| Macaca fascicularis                 | 102124609 | Model       | Mammal    |
| Bos taurus                          | 518514    | Provisional | Mammal    |
| Rattus norvegicus                   | 311783    | Provisional | Mammal    |
| Canis lupus familiaris              | 611869    | Model       | Mammal    |
| Equus caballus                      | 100065154 | Model       | Mammal    |
| Mus musculus                        | 54450     | Validated   | Mammal    |
| Sus scrofa                          | NA        |             | Mammal    |
| Ovis Aries                          | 101111354 | Model       | Mammal    |
| Felis catus                         | NA        |             | Mammal    |
| Ornithorhynchus anatinus            | NA        |             | Mammal    |
| Sarcophilus harrisii                | 100923393 | Model       | Mammal    |
| Monodelphis domestica               | 100026133 | Model       | Mammal    |
| Balaenoptera acutorostrata scammoni | 103020502 | Model       | Mammal    |
| Physeter catodon                    | 102975470 | Model       | Mammal    |
| Orcinus orca                        | 101284641 | Model       | Mammal    |
| Tursiops truncatus                  | NA        |             | Mammal    |
| Alligator mississippiensis          | 106738033 | Model       | Reptile   |
| Gavialis gangeticus                 | NA        |             | Reptile   |
| Chelonia mydas                      | NA        |             | Reptile   |
| Xenopus tropicalis                  | NA        |             | Amphibian |
| Nanorana parkeri                    | NA        |             | Amphibian |
| Gallus gallus                       | 100861586 | Model       | Bird      |
| Columba Livia                       | NA        |             | Bird      |
| Coturnix japonica                   | NA        |             | Bird      |



|                       |    |                    |
|-----------------------|----|--------------------|
| Numida meleagris      | NA | Bird               |
| Danio rerio           | NA | Bony fish          |
| Cyprinodon variegatus | NA | Bony fish          |
| Poecilia formosa      | NA | Bony fish          |
| Oncorhynchus mykiss   | NA | Bony fish          |
| Callorhynchus Milii   | NA | Cartilaginous fish |
| Salmo salar           | NA | Bony fish          |
| Cyprinus carpio       | NA | Bony fish          |
| Labrus bergylta       | NA | Bony fish          |
| Scyliorhinus canicula | NA | Cartilaginous fish |

|               |
|---------------|
| <b>IL36RN</b> |
|---------------|

|                                     |           |             |                    |
|-------------------------------------|-----------|-------------|--------------------|
| Homo sapiens                        | 26525     | Reviewed    | Mammal             |
| Macaca fascicularis                 | 102124609 | Model       | Mammal             |
| Bos taurus                          | 518514    | Provisional | Mammal             |
| Rattus norvegicus                   | 311783    | Provisional | Mammal             |
| Canis lupus familiaris              | 611869    | Model       | Mammal             |
| Equus caballus                      | 100065154 | Model       | Mammal             |
| Mus musculus                        | 54450     | Validated   | Mammal             |
| Sus scrofa                          | NA        |             | Mammal             |
| Ovis Aries                          | 101111354 | Model       | Mammal             |
| Felis catus                         | NA        |             | Mammal             |
| Ornithorhynchus anatinus            | NA        |             | Mammal             |
| Sarcophilus harrisii                | 100923393 | Model       | Mammal             |
| Monodelphis domestica               | 100026133 | Model       | Mammal             |
| Balaenoptera acutorostrata scammoni | 103020502 | Model       | Mammal             |
| Physeter catodon                    | 102975470 | Model       | Mammal             |
| Orcinus orca                        | 101284641 | Model       | Mammal             |
| Tursiops truncatus                  | NA        |             | Mammal             |
| Alligator mississippiensis          | 106738033 | Model       | Reptile            |
| Gavialis gangeticus                 | NA        |             | Reptile            |
| Chelonia mydas                      | NA        |             | Reptile            |
| Xenopus tropicalis                  | NA        |             | Amphibian          |
| Nanorana parkeri                    | NA        |             | Amphibian          |
| Gallus gallus                       | 100861586 | Model       | Bird               |
| Columba Livia                       | NA        |             | Bird               |
| Coturnix japonica                   | NA        |             | Bird               |
| Numida meleagris                    | NA        |             | Bird               |
| Danio rerio                         | NA        |             | Bony fish          |
| Cyprinodon variegatus               | NA        |             | Bony fish          |
| Poecilia formosa                    | NA        |             | Bony fish          |
| Oncorhynchus mykiss                 | NA        |             | Bony fish          |
| Callorhynchus Milii                 | NA        |             | Cartilaginous fish |
| Salmo salar                         | NA        |             | Bony fish          |
| Cyprinus carpio                     | NA        |             | Bony fish          |
| Labrus bergylta                     | NA        |             | Bony fish          |
| Scyliorhinus canicula               | NA        |             | Cartilaginous fish |

|             |
|-------------|
| <b>FGF1</b> |
|-------------|

|              |      |          |        |
|--------------|------|----------|--------|
| Homo sapiens | 2246 | Reviewed | Mammal |
|--------------|------|----------|--------|

|                                     |           |             |                    |
|-------------------------------------|-----------|-------------|--------------------|
| Macaca fascicularis                 | 102134593 | Model       | Mammal             |
| Bos taurus                          | 281160    | Model       | Mammal             |
| Rattus norvegicus                   | 25317     | Provisional | Mammal             |
| Canis lupus familiaris              | 607724    | Model       | Mammal             |
| Equus caballus                      | 100033960 | Model       | Mammal             |
| Mus musculus                        | 14164     | Validated   | Mammal             |
| Sus scrofa                          | 397497    | Model       | Mammal             |
| Ovis Aries                          | 101109353 | Model       | Mammal             |
| Felis catus                         | 101082206 | Model       | Mammal             |
| Ornithorhynchus anatinus            | 100078822 | Model       | Mammal             |
| Sarcophilus harrisii                | 100929695 | Model       | Mammal             |
| Monodelphis domestica               | 100023197 | Model       | Mammal             |
| Balaenoptera acutorostrata scammoni | 103018997 | Model       | Mammal             |
| Physeter catodon                    | NA        | Model       | Mammal             |
| Orcinus orca                        | 101277714 | Model       | Mammal             |
| Tursiops truncatus                  | 101327652 | Model       | Mammal             |
| Alligator mississippiensis          | 102570160 | Model       | Reptile            |
| Gavialis gangeticus                 | 109289995 | Model       | Reptile            |
| Chelonia mydas                      | 102931997 | Model       | Reptile            |
| Xenopus tropicalis                  | 100217324 | Provisional | Amphibian          |
| Nanorana parkeri                    | 108794559 | Model       | Amphibian          |
| Gallus gallus                       | 396094    | Model       | Bird               |
| Columba Livia                       | 102091153 | Model       | Bird               |
| Coturnix japonica                   | 107320055 | Model       | Bird               |
| Numida meleagris                    | 110405391 | Model       | Bird               |
| Danio rerio                         | 393733    | Provisional | Bony fish          |
| Cyprinodon variegatus               | NA        | Model       | Bony fish          |
| Poecilia formosa                    | 103475366 | Model       | Bony fish          |
| Oncorhynchus mykiss                 | 103184127 | Model       | Bony fish          |
| Callorhynchus Milii                 | 103184127 | Model       | Cartilaginous fish |
| Salmo salar                         | 100196882 | Model       | Bony fish          |
| Cyprinus carpio                     | 109109517 | Model       | Bony fish          |
| Labrus bergylta                     | 109995648 | Model       | Bony fish          |
| Scyliorhinus canicula               | NA        | Model       | Cartilaginous fish |

|             |
|-------------|
| <b>FGF2</b> |
|-------------|

|                          |           |             |        |
|--------------------------|-----------|-------------|--------|
| Homo sapiens             | 2247      | Reviewed    | Mammal |
| Macaca fascicularis      | NA        |             | Mammal |
| Bos taurus               | 281161    | Validated   | Mammal |
| Rattus norvegicus        | 54250     | Validated   | Mammal |
| Canis lupus familiaris   | NA        | Model       | Mammal |
| Equus caballus           | 100033955 | Model       | Mammal |
| Mus musculus             | 14173     | Validated   | Mammal |
| Sus scrofa               | 397643    | Model       | Mammal |
| Ovis Aries               | 443306    | Provisional | Mammal |
| Felis catus              | 100135772 | Model       | Mammal |
| Ornithorhynchus anatinus | NA        |             | Mammal |
| Sarcophilus harrisii     | 100934542 | Model       | Mammal |
| Monodelphis domestica    | 619384    | Provisional | Mammal |

|                                     |           |             |                    |
|-------------------------------------|-----------|-------------|--------------------|
| Balaenoptera acutorostrata scammoni | 103015722 | Model       | Mammal             |
| Physeter catodon                    | 102989017 | Model       | Mammal             |
| Orcinus orca                        | 101280803 | Model       | Mammal             |
| Tursiops truncatus                  | 101338598 | Model       | Mammal             |
| Alligator mississippiensis          | 102567370 | Model       | Reptile            |
| Gavialis gangeticus                 | 109301132 | Model       | Reptile            |
| Chelonia mydas                      | 102931444 | Model       | Reptile            |
| Xenopus tropicalis                  | 550087    | Model       | Amphibian          |
| Nanorana parkeri                    | 108790780 | Model       | Amphibian          |
| Gallus gallus                       | 396413    | Model       | Bird               |
| Columba Livia                       | 110364865 | Model       | Bird               |
| Coturnix japonica                   | 10313543  | Model       | Bird               |
| Numida meleagris                    | NA        | Model       | Bird               |
| Danio rerio                         | 404231    | Provisional | Bony fish          |
| Cyprinodon variegatus               | 107099215 | Model       | Bony fish          |
| Poecilia formosa                    | 103137295 | Model       | Bony fish          |
| Oncorhynchus mykiss                 | 100136280 | Provisional | Bony fish          |
| Callorhynchus Milii                 | 103188323 | Model       | Cartilaginous fish |
| Salmo salar                         | 106611625 | Model       | Bony fish          |
| Cyprinus carpio                     | NA        | Model       | Bony fish          |
| Labrus bergylta                     | 109999743 | Model       | Bony fish          |
| Scyliorhinus canicula               |           | Model       | Cartilaginous fish |

#### FGF4

|                                     |           |             |           |
|-------------------------------------|-----------|-------------|-----------|
| Homo sapiens                        | 2249      | Reviewed    | Mammal    |
| Macaca fascicularis                 | 102134588 | Model       | Mammal    |
| Bos taurus                          | 618474    | Provisional | Mammal    |
| Rattus norvegicus                   | 116499    | Model       | Mammal    |
| Canis lupus familiaris              | 483680    | Model       | Mammal    |
| Equus caballus                      | NA        | Model       | Mammal    |
| Mus musculus                        | 14175     | Validated   | Mammal    |
| Sus scrofa                          | 100518595 | Model       | Mammal    |
| Ovis Aries musimon                  | 101116004 | Model       | Mammal    |
| Felis catus                         | NA        |             | Mammal    |
| Ornithorhynchus anatinus            | 100075228 | Model       | Mammal    |
| Sarcophilus harrisii                | 100921812 | Model       | Mammal    |
| Monodelphis domestica               | 100021631 | Model       | Mammal    |
| Balaenoptera acutorostrata scammoni | NA        |             | Mammal    |
| Physeter catodon                    | NA        |             | Mammal    |
| Orcinus orca                        | 101273794 | Model       | Mammal    |
| Tursiops truncatus                  | 101331363 | Model       | Mammal    |
| Alligator mississippiensis          | 102563000 | Model       | Reptile   |
| Gavialis gangeticus                 | 109298992 | Model       | Reptile   |
| Chelonia mydas                      | NA        |             | Reptile   |
| Xenopus tropicalis                  | 100217325 | Provisional | Amphibian |
| Nanorana parkeri                    | 108785455 | Model       | Amphibian |
| Gallus gallus                       | 428857    | Validated   | Bird      |
| Columba Livia                       | 102095791 | Model       | Bird      |
| Coturnix japonica                   | 107314467 | Model       | Bird      |

|                       |           |           |                    |
|-----------------------|-----------|-----------|--------------------|
| Numida meleagris      | 110401571 | Model     | Bird               |
| Danio rerio           | 570435    | Validated | Bony fish          |
| Cyprinodon variegatus | 107096214 | Model     | Bony fish          |
| Poecilia formosa      | 103150952 | Model     | Bony fish          |
| Oncorhynchus mykiss   | NA        |           | Bony fish          |
| Callorhynchus Milii   | 103175016 | Model     | Cartilaginous fish |
| Salmo salar           | NA        |           | Bony fish          |
| Cyprinus carpio       | 758818084 | Model     | Bony fish          |
| Labrus bergylta       | NA        |           | Bony fish          |
| Scyliorhinus canicula | NA        |           | Cartilaginous fish |

|             |
|-------------|
| <b>FGF7</b> |
|-------------|

|                                     |           |             |                    |
|-------------------------------------|-----------|-------------|--------------------|
| Homo sapiens                        | 2252      | Reviewed    | Mammal             |
| Macaca fascicularis                 | 102131922 | Model       | Mammal             |
| Bos taurus                          | 616885    | Provisional | Mammal             |
| Rattus norvegicus                   | 29348     | Model       | Mammal             |
| Canis lupus familiaris              | 403915    | Model       | Mammal             |
| Equus caballus                      | 100033961 | Model       | Mammal             |
| Mus musculus                        | 14178     | Validated   | Mammal             |
| Sus scrofa                          | 397281    | Model       | Mammal             |
| Ovis Aries                          | 443095    | Model       | Mammal             |
| Felis catus                         | 101097982 | Model       | Mammal             |
| Ornithorhynchus anatinus            | NA        |             | Mammal             |
| Sarcophilus harrisii                | 100925383 | Model       | Mammal             |
| Monodelphis domestica               | 100025923 | Model       | Mammal             |
| Balaenoptera acutorostrata scammoni | 103020278 | Model       | Mammal             |
| Physeter catodon                    | 102994154 | Model       | Mammal             |
| Orcinus orca                        | 101288260 | Model       | Mammal             |
| Tursiops truncatus                  | 101322398 | Model       | Mammal             |
| Alligator mississippiensis          | 109280173 | Model       | Reptile            |
| Gavialis gangeticus                 | 109288585 | Model       | Reptile            |
| Chelonia mydas                      | NA        |             | Reptile            |
| Xenopus tropicalis                  | 734697    | Provisional | Amphibian          |
| Nanorana parkeri                    | 108792194 | Model       | Amphibian          |
| Gallus gallus                       | 415439    | Model       | Bird               |
| Columba Livia                       | 102087779 | Model       | Bird               |
| Coturnix japonica                   | 107318735 | Model       | Bird               |
| Numida meleagris                    | 110404057 | Model       | Bird               |
| Danio rerio                         | 493181    | Model       | Bony fish          |
| Cyprinodon variegatus               | 107085362 | Model       | Bony fish          |
| Poecilia formosa                    | 103462084 | Model       | Bony fish          |
| Oncorhynchus mykiss                 | NA        |             | Bony fish          |
| Callorhynchus Milii                 | 103186971 | Provisional | Cartilaginous fish |
| Salmo salar                         | NA        |             | Bony fish          |
| Cyprinus carpio                     | NA        |             | Bony fish          |
| Labrus bergylta                     | 109989468 | Model       | Bony fish          |
| Scyliorhinus canicula               | NA        |             | Cartilaginous fish |

|             |
|-------------|
| <b>FGF9</b> |
|-------------|

|              |      |          |        |
|--------------|------|----------|--------|
| Homo sapiens | 2254 | Reviewed | Mammal |
|--------------|------|----------|--------|

|                                     |           |             |                    |
|-------------------------------------|-----------|-------------|--------------------|
| Macaca fascicularis                 | 102140725 | Model       | Mammal             |
| Bos taurus                          | 613731    | Provisional | Mammal             |
| Rattus norvegicus                   | 25444     | Provisional | Mammal             |
| Canis lupus familiaris              | 477340    | Model       | Mammal             |
| Equus caballus                      | 100050353 | Model       | Mammal             |
| Mus musculus                        | 14180     | Validated   | Mammal             |
| Sus scrofa                          | 396717    | Provisional | Mammal             |
| Ovis Aries                          | 101116844 | Model       | Mammal             |
| Felis catus                         | 101084335 | Model       | Mammal             |
| Ornithorhynchus anatinus            | 100089319 | Model       | Mammal             |
| Sarcophilus harrisii                | 100920456 | Model       | Mammal             |
| Monodelphis domestica               | NA        |             | Mammal             |
| Balaenoptera acutorostrata scammoni | 103004048 | Model       | Mammal             |
| Physeter catodon                    | 102990012 | Model       | Mammal             |
| Orcinus orca                        | 101284280 | Model       | Mammal             |
| Tursiops truncatus                  | 101322077 | Model       | Mammal             |
| Alligator mississippiensis          | 102577004 | Model       | Reptile            |
| Gavialis gangeticus                 | 109303266 | Model       | Reptile            |
| Chelonia mydas                      | 102933711 | Model       | Reptile            |
| Xenopus tropicalis                  | 378562    | Provisional | Amphibian          |
| Nanorana parkeri                    | 108793985 | Model       | Amphibian          |
| Gallus gallus                       | 378917    | Provisional | Bird               |
| Columba Livia                       | 102098285 | Model       | Bird               |
| Coturnix japonica                   | 107308312 | Model       | Bird               |
| Numida meleagris                    | 110389317 | Model       | Bird               |
| Danio rerio                         | NA        |             | Bony fish          |
| Cyprinodon variegatus               | NA        |             | Bony fish          |
| Poecilia formosa                    | NA        |             | Bony fish          |
| Oncorhynchus mykiss                 | NA        |             | Bony fish          |
| Callorhynchus Milii                 | 103183275 | Model       | Cartilaginous fish |
| Salmo salar                         | NA        | Model       | Bony fish          |
| Cyprinus carpio                     | NA        | Model       | Bony fish          |
| Labrus bergylta                     | NA        | Model       | Bony fish          |
| Scyliorhinus canicula               | NA        | Model       | Cartilaginous fish |

|              |
|--------------|
| <b>FGF10</b> |
|--------------|

|                          |           |             |        |
|--------------------------|-----------|-------------|--------|
| Homo sapiens             | 602115    | Reviewed    | Mammal |
| Macaca fascicularis      | 102143550 | Provisional | Mammal |
| Bos taurus               | 326285    | Provisional | Mammal |
| Rattus norvegicus        | 25443     | Provisional | Mammal |
| Canis lupus familiaris   | 612454    | Model       | Mammal |
| Equus caballus           | 100052655 | Model       | Mammal |
| Mus musculus             | 14165     | Validated   | Mammal |
| Sus scrofa               | 100525086 | Model       | Mammal |
| Ovis Aries               | 443074    | Provisional | Mammal |
| Felis catus              | 101090489 | Model       | Mammal |
| Ornithorhynchus anatinus | NA        |             | Mammal |
| Sarcophilus harrisii     | NA        |             | Mammal |
| Monodelphis domestica    | 100012692 | Model       | Mammal |

|                                     |           |             |                    |
|-------------------------------------|-----------|-------------|--------------------|
| Balaenoptera acutorostrata scammoni | NA        |             | Mammal             |
| Physeter catodon                    | NA        |             | Mammal             |
| Orcinus orca                        | 101281389 | Model       | Mammal             |
| Tursiops truncatus                  | NA        |             | Mammal             |
| Alligator mississippiensis          | 102568685 | Model       | Reptile            |
| Gavialis gangeticus                 | 109297843 | Model       | Reptile            |
| Chelonia mydas                      | 102934890 | Model       | Reptile            |
| Xenopus tropicalis                  | 548923    | Model       | Amphibian          |
| Nanorana parkeri                    | 108796567 | Model       | Amphibian          |
| Gallus gallus                       | 395432    | Provisional | Bird               |
| Columba Livia                       | 110357664 | Model       | Bird               |
| Coturnix japonica                   | 107305970 | Model       | Bird               |
| Numida meleagris                    | NA        |             | Bird               |
| Danio rerio                         | 359830    | Provisional | Bony fish          |
| Cyprinodon variegatus               | 107089663 | Model       | Bony fish          |
| Poecilia formosa                    | 103469999 | Model       | Bony fish          |
| Oncorhynchus mykiss                 | NA        |             | Bony fish          |
| Callorhynchus Milii                 | 103177849 | Model       | Cartilaginous fish |
| Salmo salar                         | 106580601 | Model       | Bony fish          |
| Cyprinus carpio                     | NA        |             | Bony fish          |
| Labrus bergylta                     | NA        |             | Bony fish          |
| Scyliorhinus canicula               | NA        | Model       | Cartilaginous fish |

#### FGF19

|                                     |           |             |           |
|-------------------------------------|-----------|-------------|-----------|
| Homo sapiens                        | 603891    | Reviewed    | Mammal    |
| Macaca fascicularis                 | 102134957 | Model       | Mammal    |
| Bos taurus                          | 521475    | Provisional | Mammal    |
| Rattus norvegicus                   | 620166    | Provisional | Mammal    |
| Canis lupus familiaris              | 483681    | Model       | Mammal    |
| Equus caballus                      | NA        | Model       | Mammal    |
| Mus musculus                        | NA        | Validated   | Mammal    |
| Sus scrofa                          | 100518950 | Model       | Mammal    |
| Ovis Aries                          | 101115744 | Model       | Mammal    |
| Felis catus                         | 101087099 | Model       | Mammal    |
| Ornithorhynchus anatinus            | 100075189 | Model       | Mammal    |
| Sarcophilus harrisii                | NA        |             | Mammal    |
| Monodelphis domestica               | 100021575 | Model       | Mammal    |
| Balaenoptera acutorostrata scammoni | 103012083 | Model       | Mammal    |
| Physeter catodon                    | 102974372 | Model       | Mammal    |
| Orcinus orca                        | 101272704 | Model       | Mammal    |
| Tursiops truncatus                  | 101335071 | Model       | Mammal    |
| Alligator mississippiensis          | 102563235 | Model       | Reptile   |
| Gavialis gangeticus                 | 109298993 | Model       | Reptile   |
| Chelonia mydas                      | 102948383 | Model       | Reptile   |
| Xenopus tropicalis                  | 100217329 | Model       | Amphibian |
| Nanorana parkeri                    | 108785439 | Model       | Amphibian |
| Gallus gallus                       | 395394    | Validated   | Bird      |
| Columba Livia                       | 102095975 | Model       | Bird      |
| Coturnix japonica                   | 107314429 | Model       | Bird      |

|                       |           |       |                    |
|-----------------------|-----------|-------|--------------------|
| Numida meleagris      | 110400908 | Model | Bird               |
| Danio rerio           | 368245    | Model | Bony fish          |
| Cyprinodon variegatus | NA        |       | Bony fish          |
| Poecilia formosa      | 103462294 | Model | Bony fish          |
| Oncorhynchus mykiss   | 110526225 | Model | Bony fish          |
| Callorhynchus Milii   | 103175015 | Model | Cartilaginous fish |
| Salmo salar           | NA        |       | Bony fish          |
| Cyprinus carpio       | 109049194 | Model | Bony fish          |
| Labrus bergylta       | 109982309 | Model | Bony fish          |
| Scyliorhinus canicula | NA        |       | Cartilaginous fish |

|              |
|--------------|
| <b>HAX-1</b> |
|--------------|

|                                     |           |             |                    |
|-------------------------------------|-----------|-------------|--------------------|
| Homo sapiens                        | 10456     | Reviewed    | Mammal             |
| Macaca fascicularis                 | 102119274 | Model       | Mammal             |
| Bos taurus                          | 506895    | Model       | Mammal             |
| Rattus norvegicus                   | NA        |             | Mammal             |
| Canis lupus familiaris              | 480134    | Model       | Mammal             |
| Equus caballus                      | 100056899 | Model       | Mammal             |
| Mus musculus                        | 23897     | Validated   | Mammal             |
| Sus scrofa                          | 100739544 | Model       | Mammal             |
| Ovis Aries                          | 101111760 | Model       | Mammal             |
| Felis catus                         | 101097787 | Model       | Mammal             |
| Ornithorhynchus anatinus            | 100089567 | Model       | Mammal             |
| Sarcophilus harrisii                | 100918638 | Model       | Mammal             |
| Monodelphis domestica               | 100015562 | Model       | Mammal             |
| Balaenoptera acutorostrata scammoni | 102997412 | Model       | Mammal             |
| Physeter catodon                    | 102993879 | Model       | Mammal             |
| Orcinus orca                        | 101280540 | Model       | Mammal             |
| Tursiops truncatus                  | 101339719 | Model       | Mammal             |
| Alligator mississippiensis          | 102570010 | Model       | Reptile            |
| Gavialis gangeticus                 | 109304128 | Model       | Reptile            |
| Chelonia mydas                      | 102948001 | Model       | Reptile            |
| Xenopus tropicalis                  | 100485912 | Model       | Amphibian          |
| Nanorana parkeri                    | 108799655 | Model       | Amphibian          |
| Gallus gallus                       | 107055138 | Model       | Bird               |
| Columba Livia                       | NA        |             | Bird               |
| Coturnix japonica                   | 107324498 | Model       | Bird               |
| Numida meleagris                    | 110387961 | Model       | Bird               |
| Danio rerio                         | 436609    | Provisional | Bony fish          |
| Cyprinodon variegatus               | 107101122 | Model       | Bony fish          |
| Poecilia formosa                    | 103130962 | Model       | Bony fish          |
| Oncorhynchus mykiss                 | 110495990 | Model       | Bony fish          |
| Callorhynchus Milii                 | 24402279  | Model       | Cartilaginous fish |
| Salmo salar                         | 100194877 | Provisional | Bony fish          |
| Cyprinus carpio                     | NA        | Model       | Bony fish          |
| Labrus bergylta                     | 10995026  | Model       | Bony fish          |
| Scyliorhinus canicula               | NA        | Model       | Cartilaginous fish |
| Pseudomyrmex gracilis               | 109852091 | Model       | Arthropod          |
| Cephus cinctus                      | 107271917 | Model       | Arthropod          |
| Fopius arisanus                     | 105273834 | Model       | Arthropod          |

Crassostrea gigas 105340833 Model Mollusca

| Taxa                                | Gene ID   | RefSeq status | Clade              |
|-------------------------------------|-----------|---------------|--------------------|
| <b>IL1R1</b>                        |           |               |                    |
| Homo sapien                         | 3554      | Reviewed      | Mammal             |
| Macaca fascicularis                 | 102146317 | Model         | Mammal             |
| Bos taurus                          | 515640    | Validated     | Mammal             |
| Rattus norvegicus                   | 25663     | Provisional   | Mammal             |
| Canis lupus familiaris              | 481328    | Model         | Mammal             |
| Equus caballus                      | 100009699 | Validated     | Mammal             |
| Mus musculus                        | 16177     | Validated     | Mammal             |
| Sus scrofa                          | 100626904 | Model         | Mammal             |
| Ovis Aries                          | 101103054 | Model         | Mammal             |
| Felis catus                         | 101080705 | Model         | Mammal             |
| Ornithorhynchus anatinus            | 100084073 | Model         | Mammal             |
| Sarcophilus harrisii                | 100913514 | Model         | Mammal             |
| Monodelphis domestica               | 100017751 | Model         | Mammal             |
| Balaenoptera acutorostrata scammoni | 102998234 | Model         | Mammal             |
| Physeter catodon                    | 102973768 | Model         | Mammal             |
| Orcinus orca                        | 101277609 | Model         | Mammal             |
| Tursiops truncatus                  | 101329065 | Model         | Mammal             |
| Alligator mississippiensis          | NA        |               | Reptile            |
| Gavialis gangeticus                 | NA        |               | Reptile            |
| Chelonia mydas                      | NA        |               | Reptile            |
| Xenopus tropicalis                  | 100491546 | Model         | Amphibian          |
| Nanorana parkeri                    | NA        |               | Amphibian          |
| Gallus gallus                       | 396481    | Provisional   | Bird               |
| Columba ivia                        | 102097520 | Model         | Bird               |
| Coturnix japonica                   | NA        |               | Bird               |
| Numida meleagris                    | NA        |               | Bird               |
| Danio rerio                         | NA        |               | Bony fish          |
| Cyprinus carpio                     | NA        |               | Bony fish          |
| Mesocricetus auratus                | 101823176 | Model         | Bony Fish          |
| Oncorhynchus mykiss                 | NA        |               | Bony fish          |
| Callorhynchus Milii                 | NA        |               | Cartilaginous fish |
| Salmo salar                         | 100136530 | Model         | Bony fish          |
| Cyprinus carpio                     | NA        |               | Bony Fish          |
| Labrus bergylta                     | NA        |               | Bony Fish          |

|                        |           |             |        |
|------------------------|-----------|-------------|--------|
| <b>IL1R2</b>           |           |             |        |
| Homo sapiens           | 7850      | Reviewed    | Mammal |
| Macaca fascicularis    | 102143926 | Provisional | Mammal |
| Bos taurus             | 515700    | Provisional | Mammal |
| Rattus norvegicus      | 117022    | Provisional | Mammal |
| Canis lupus familiaris | 481330    | Model       | Mammal |
| Equus caballus         | 100033831 | Provisional | Mammal |
| Mus musculus           | 16178     | Provisional | Mammal |
| Sus scrofa             | 100628112 | Model       | Mammal |
| Tursiops truncatus     | 101337838 | Model       | Mammal |
| Ovis Aries             | 101103308 | Model       | Mammal |



|                                     |            |             |                    |
|-------------------------------------|------------|-------------|--------------------|
| Felis catus                         | 101080961  | Model       | Mammal             |
| Sarcophilus harrisii                | 100913252  | Model       | Mammal             |
| Monodelphis domestica               | 100017640  | Model       | Mammal             |
| Balaenoptera acutorostrata scammoni | 102999629  | Model       | Mammal             |
| Physeter catodon                    | NA         | Model       | Mammal             |
| Orcinus orca                        | 101277609  | Model       | Mammal             |
| Tursiops truncatus                  | 101337838  | Model       | Mammal             |
| Alligator mississippiensis          | 1011604302 | Model       | Reptile            |
| Gavialis gangeticus                 | NA         |             | Reptile            |
| Chelonia mydas                      | 102937756  | Model       | Reptile            |
| Xenopus tropicalis                  | 548430     | Model       | Amphibian          |
| Nanorana parkeri                    | 108785107  | Model       | Amphibian          |
| Gallus gallus                       | 418715     | Model       | Bird               |
| Columba Livia                       | NA         |             | Bird               |
| Coturnix japonica                   | 107306854  | Model       | Bird               |
| Numida meleagris                    | 110406769  | Model       | Bird               |
| Danio rerio                         | NA         |             | Bony fish          |
| Cyprinodon variegatus               | NA         |             | Bony fish          |
| Poecilia formosa                    | NA         |             | Bony fish          |
| Oncorhynchus mykiss                 | NA         |             | Bony fish          |
| Callorhynchus Mili                  | NA         |             | Cartilaginous fish |
| Salmo salar                         | 100270808  | Provisional | Bony fish          |
| Cyprinus carpio                     | NA         |             | Bony fish          |
| Labrus bergylta                     | 109974022  | Model       | Bony fish          |

|                       |
|-----------------------|
| <b>IL1R3/IL-1RAcP</b> |
|-----------------------|

|                                     |           |             |           |
|-------------------------------------|-----------|-------------|-----------|
| Homo sapiens                        | 3556      | REVIEWED    | Mammal    |
| Macaca fascicularis                 | 102133222 | Model       | Mammal    |
| Bos taurus                          | 539334    | Model       | Mammal    |
| Rattus norvegicus                   | 2893      | PROVISIONAL | Mammal    |
| Canis lupus familiaris              | 488126    | Model       | Mammal    |
| Equus caballus                      | 100068726 | Model       | Mammal    |
| Mus musculus                        | 16180     | REVIEWED    | Mammal    |
| Sus scrofa                          | 100628318 | Model       | Mammal    |
| Ovis Aries                          | 101108354 | Model       | Mammal    |
| Felis catus                         | 101094125 | Model       | Mammal    |
| Ornithorhynchus anatinus            | NA        |             | Mammal    |
| Sarcophilus harrisii                | 100933140 | Model       | Mammal    |
| Monodelphis domestica               | 100016835 | Model       | Mammal    |
| Balaenoptera acutorostrata scammoni | 103002906 | Model       | Mammal    |
| Physeter catodon                    | 102994287 | Model       | Mammal    |
| Orcinus orca                        | 101285541 | Model       | Mammal    |
| Tursiops truncatus                  | 101335680 | Model       | Mammal    |
| Alligator mississippiensis          | 102567774 | Model       | Reptile   |
| Gavialis gangeticus                 | NA        |             | Reptile   |
| Chelonia mydas                      | 102940652 | Model       | Reptile   |
| Xenopus tropicalis                  | 100216065 | Model       | Amphibian |
| Nanorana parkeri                    | 108804591 | Model       | Amphibian |
| Gallus gallus                       | 424908    | Model       | Bird      |
| Columba Livia                       | 102092020 | Model       | Bird      |

|                       |           |       |                    |
|-----------------------|-----------|-------|--------------------|
| Coturnix japonica     | 107318248 | Model | Bird               |
| Numida meleagris      | NA        |       | Bird               |
| Danio rerio           | 100331351 | Model | Bony fish          |
| Cyprinodon variegatus | 107086872 | Model | Bony fish          |
| Poecilia formosa      | 103150889 | Model | Bony fish          |
| Oncorhynchus mykiss   | NA        |       | Bony fish          |
| Callorhinchus Milii   | NA        |       | Cartilaginous fish |
| Salmo salar           | NA        |       | Bony fish          |
| Cyprinus carpio       | NA        |       | Bony fish          |
| Labrus bergylta       | NA        |       | Bony fish          |

|                          |
|--------------------------|
| <b>IL1R4/IL-1RL1/ST2</b> |
|--------------------------|

|                                     |           |             |                    |
|-------------------------------------|-----------|-------------|--------------------|
| Homo sapiens                        | 9173      | REVIEWED    | Mammal             |
| Macaca fascicularis                 | 102115135 | Model       | Mammal             |
| Bos taurus                          | 520709    | Model       | Mammal             |
| Rattus norvegicus                   | 25556     | Model       | Mammal             |
| Canis lupus familiaris              | 611442    | Model       | Mammal             |
| Equus caballus                      | 100058357 | Model       | Mammal             |
| Mus musculus                        | 17082     | Validated   | Mammal             |
| Sus scrofa                          | NA        | Model       | Mammal             |
| Ovis Aries                          | 101109529 | Model       | Mammal             |
| Felis catus                         | 101080448 | Model       | Mammal             |
| Ornithorhynchus anatinus            | NA        | Model       | Mammal             |
| Sarcophilus harrisii                | 100914043 | Model       | Mammal             |
| Monodelphis domestica               | 100017856 | Model       | Mammal             |
| Balaenoptera acutorostrata scammoni | 103013226 | Model       | Mammal             |
| Physeter catodon                    | 102974232 | Model       | Mammal             |
| Orcinus orca                        | 102974232 | Model       | Mammal             |
| Tursiops truncatus                  | 101316920 | Model       | Mammal             |
| Alligator mississippiensis          | 102560559 | Model       | Reptile            |
| Gavialis gangeticus                 | NA        |             | Reptile            |
| Chelonia mydas                      | 102944780 | Model       | Reptile            |
| Xenopus tropicalis                  | xxxx      | Model       | Amphibian          |
| Nanorana parkeri                    | xxxx      | Model       | Amphibian          |
| Gallus gallus                       | 374136    | Model       | Bird               |
| Columba Livia                       | 102097335 | Model       | Bird               |
| Coturnix japonica                   | 107306743 | Model       | Bird               |
| Numida meleagris                    | NA        |             | Bird               |
| Danio rerio                         | 407649    | Model       | Bony fish          |
| Cyprinodon variegatus               | NA        | Model       | Bony fish          |
| Poecilia formosa                    | NA        | Model       | Bony fish          |
| Oncorhynchus mykiss                 | 526253038 | PROVISIONAL | Bony fish          |
| Callorhinchus Milii                 | NA        |             | Cartilaginous fish |
| Salmo salar                         | NA        |             |                    |
| Cyprinus carpio                     | NA        |             |                    |
| Labrus bergylta                     | NA        |             |                    |

|                      |
|----------------------|
| <b>IL1R5/IL-118R</b> |
|----------------------|

|                     |           |          |        |
|---------------------|-----------|----------|--------|
| Homo sapiens        | 4504655   | REVIEWED | Mammal |
| Macaca fascicularis | 544479591 | Model    | Mammal |

|                                     |           |           |                    |
|-------------------------------------|-----------|-----------|--------------------|
| Bos taurus                          | 528967972 | Model     | Mammal             |
| Rattus norvegicus                   | 301365    | Model     | Mammal             |
| Canis lupus familiaris              | 301365    | Model     | Mammal             |
| Equus caballus                      | 100058269 | Model     | Mammal             |
| Mus musculus                        | 16182     | Validated | Mammal             |
| Sus scrofa                          | 397179    | Model     | Mammal             |
| Ovis Aries                          | 101102552 | Model     | Mammal             |
| Felis catus                         | 493938    | VALIDATED | Mammal             |
| Ornithorhynchus anatinus            | NA        |           | Mammal             |
| Sarcophilus harrisi                 | 100914298 | Model     | Mammal             |
| Monodelphis domestica               | 100017899 | Model     | Mammal             |
| Balaenoptera acutorostrata scammoni | 103012740 | Model     | Mammal             |
| Physeter catodon                    | 102973670 | Model     | Mammal             |
| Orcinus orca                        | 101275947 | Model     | Mammal             |
| Tursiops truncatus                  | 101331669 | Model     | Mammal             |
| Alligator mississippiensis          | 102560330 | Model     | Reptile            |
| Gavialis gangeticus                 | NA        |           |                    |
| Chelonia mydas                      | 102944555 | Model     | Reptile            |
| Xenopus tropicalis                  | NA        |           | Amphibian          |
| Nanorana parkeri                    | NA        |           | Amphibian          |
| Gallus gallus                       | 418717    | Model     | Bird               |
| Columba Livia                       | 102085680 | Model     | Bird               |
| Coturnix japonica                   | 107306721 | Model     | Bird               |
| Numida meleagris                    | NA        |           | Bird               |
| Danio rerio                         | NA        |           | Bony fish          |
| Cyprinodon variegatus               | NA        |           | Bony fish          |
| Poecilia formosa                    | NA        |           | Bony fish          |
| Oncorhynchus mykiss                 | NA        |           | Bony fish          |
| Callorhynchus Mili                  | 103172473 | Model     | Cartilaginous fish |
| NA                                  |           |           |                    |
| NA                                  |           |           |                    |
| NA                                  |           |           |                    |

|                      |
|----------------------|
| <b>IL1R6/IL-1RL2</b> |
|----------------------|

|                                     |           |           |        |
|-------------------------------------|-----------|-----------|--------|
| Homo sapiens                        | 8808      | REVIEWED  | Mammal |
| Macaca fascicularis                 | 102145305 | Model     | Mammal |
| Bos taurus                          | 522114    | Model     | Mammal |
| Rattus norvegicus                   | 621782    | Model     | Mammal |
| Canis lupus familiaris              | 611453    | Model     | Mammal |
| Equus asinus                        | 106839401 | Model     | Mammal |
| Mus musculus                        | 107527    | Validated | Mammal |
| Sus scrofa                          | 106509756 | Model     | Mammal |
| Ovis Aries                          | 101102800 | Model     | Mammal |
| Felis catus                         | 101085113 | Model     | Mammal |
| Ornithorhynchus anatinus            | NA        |           | Mammal |
| Sarcophilus harrisi                 | 100913777 | Model     | Mammal |
| Monodelphis domestica               | 100017791 | Model     | Mammal |
| Balaenoptera acutorostrata scammoni | 103013514 | Model     | Mammal |
| Physeter catodon                    | 102974910 | Model     | Mammal |
| Orcinus orca                        | 101276455 | Model     | Mammal |

|                            |           |       |                    |
|----------------------------|-----------|-------|--------------------|
| Tursiops truncatus         | 101333629 | Model | Mammal             |
| Alligator mississippiensis | NA        |       | Reptile            |
| Gavialis gangeticus        | 109303181 | Model | Reptile            |
| Chelonia mydas             | 102945219 | Model | Reptile            |
| Xenopus tropicalis         | NA        |       | Amphibian          |
| Nanorana parkeri           | NA        |       | Amphibian          |
| Gallus gallus              | 418716    | Model | Bird               |
| Columba Livia              | NA        |       | Bird               |
| Coturnix japonica          | NA        |       | Bird               |
| Numida meleagris           | NA        |       | Bird               |
| Danio rerio                | NA        |       | Bony fish          |
| Cyprinodon variegatus      | NA        |       | Bony fish          |
| Poecilia formosa           | NA        |       | Bony fish          |
| Oncorhynchus mykiss        | NA        |       | Bony fish          |
| Callorhynchus Milii        | NA        |       | Cartilaginous fish |
| Salmo salar                | NA        |       | Bony fish          |
| Cyprinus carpio            | NA        |       | Bony fish          |
| Labrus bergylta            | NA        |       | Bony fish          |

|                      |
|----------------------|
| <b>IL1R7/IL18RAP</b> |
|----------------------|

|                                     |           |          |           |
|-------------------------------------|-----------|----------|-----------|
| Homo sapiens                        | 8807      | REVIEWED | Mammal    |
| Macaca fascicularis                 | 712046    | Model    | Mammal    |
| Bos taurus                          | 493716    | Model    | Mammal    |
| Rattus norvegicus                   | 727867    | Model    | Mammal    |
| Canis lupus familiaris              | 481327    | Model    | Mammal    |
| Equus caballus                      | 100050212 | Model    | Mammal    |
| Mus musculus                        | 16174     | REVIEWED | Mammal    |
| Sus scrofa                          | NA        | Model    | Mammal    |
| Ovis Aries                          | 101109262 | Model    | Mammal    |
| Felis catus                         | 101084868 | Model    | Mammal    |
| Ornithorhynchus anatinus            | NA        | Model    | Mammal    |
| Sarcophilus harrisi                 | 100929823 | Model    | Mammal    |
| Monodelphis domestica               | 100017931 | Model    | Mammal    |
| Balaenoptera acutorostrata scammoni | 103012459 | Model    | Mammal    |
| Physeter catodon                    | NA        | Model    | Mammal    |
| Orcinus orca                        | 101277121 | Model    | Mammal    |
| Tursiops truncatus                  | 101331381 | Model    | Mammal    |
| Alligator mississippiensis          | 102560095 | Model    | Reptile   |
| Gavialis gangeticus                 | 109303410 | Model    | Reptile   |
| Chelonia mydas                      | NA        | Model    | Reptile   |
| Xenopus tropicalis                  | 100491212 | Model    | Amphibian |
| Nanorana parkeri                    | 108785111 | Model    | Amphibian |
| Gallus gallus                       | 101750396 | Model    | Bird      |
| Columba Livia                       | 102085495 | Model    | Bird      |
| Coturnix japonica                   | 107307916 | Model    | Bird      |
| Numida meleagris                    | NA        |          | Bird      |
| Danio rerio                         | NA        |          | Bony fish |
| Cyprinodon variegatus               | NA        |          | Bony fish |
| Poecilia formosa                    | NA        |          | Bony fish |
| Oncorhynchus mykiss                 | NA        |          | Bony fish |

|                     |           |       |                    |
|---------------------|-----------|-------|--------------------|
| Callorhynchus Milii | 103172467 | Model | Cartilaginous fish |
| Salmo salar         | NA        |       | Bony fish          |
| Cyprinus carpio     | NA        |       | Bony fish          |
| Labrus bergylta     | NA        |       | Bony fish          |

#### IL1R8/SIGRR

|                                     |           |             |                    |
|-------------------------------------|-----------|-------------|--------------------|
| Homo sapiens                        | 59307     | Validated   | Mammal             |
| Macaca fascicularis                 | 101864854 | Model       | Mammal             |
| Bos taurus                          | 531801    | Model       | Mammal             |
| Rattus norvegicus                   | 309106    | Model       | Mammal             |
| Canis lupus familiaris              | 100686933 | Model       | Mammal             |
| Equus caballus                      | 100054544 | Model       | Mammal             |
| Mus musculus                        | 24058     | Validated   | Mammal             |
| Sus scrofa                          | 100626800 | Provisional | Mammal             |
| Ovis Aries                          | 101104191 | Model       | Mammal             |
| Felis catus                         | 101100416 | Model       | Mammal             |
| Ornithorhynchus anatinus            | NA        | Model       | Mammal             |
| Sarcophilus harrisii                | 100921726 | Model       | Mammal             |
| Monodelphis domestica               | NA        | Model       | Mammal             |
| Balaenoptera acutorostrata scammoni | 103008982 | Model       | Mammal             |
| Physeter catodon                    | 102989861 | Model       | Mammal             |
| Orcinus orca                        | 101286986 | Model       | Mammal             |
| Tursiops truncatus                  | NA        | Model       | Mammal             |
| Alligator mississippiensis          | 102569037 | Model       | Reptile            |
| Gavialis gangeticus                 | 109299250 | Model       | Reptile            |
| Chelonia mydas                      | 102929383 | Model       | Reptile            |
| Xenopus tropicalis                  | 100486638 | Model       | Amphibian          |
| Nanorana parkeri                    | 108791997 | Model       | Amphibian          |
| Gallus gallus                       | 422995    | Model       | Bird               |
| Columba Livia                       | 102084113 | Model       | Bird               |
| Coturnix japonica                   | 107314267 | Model       | Bird               |
| Numida meleagris                    | 110401651 | Model       | Bird               |
| Danio rerio                         | 563606    | Provisional | Bony fish          |
| Cyprinodon variegatus               | NA        | Model       | Bony fish          |
| Poecilia formosa                    | 103156514 | Model       | Bony fish          |
| Oncorhynchus mykiss                 | 110501108 | Model       | Bony fish          |
| Callorhynchus Milii                 | NA        | Model       | Cartilaginous fish |
| Salmo salar                         | 100380553 | Model       | Bony fish          |
| Cyprinus carpio                     | 109070341 | Model       | Bony fish          |
| Labrus bergylta                     | 110003576 | Model       | Bony fish          |

#### IL1R9/IL1RAPL1

|                        |           |             |        |
|------------------------|-----------|-------------|--------|
| Homo sapiens           | 11141     | Reviewed    | Mammal |
| Macaca fascicularis    | 102133143 | Model       | Mammal |
| Bos taurus             | 541298    | Model       | Mammal |
| Rattus norvegicus      | 317553    | Provisional | Mammal |
| Canis lupus familiaris | 491800    | Model       | Mammal |
| Equus caballus         | 100052404 | Model       | Mammal |
| Mus musculus           | 331461    | Validated   | Mammal |
| Sus scrofa             | 100621199 | Model       | Mammal |

|                                     |           |       |                    |
|-------------------------------------|-----------|-------|--------------------|
| Ovis Aries                          | 101117137 | Model | Mammal             |
| Felis catus                         | 101082883 | Model | Mammal             |
| Ornithorhynchus anatinus            | 100074745 | Model | Mammal             |
| Sarcophilus harrisii                | 100923060 | Model | Mammal             |
| Monodelphis domestica               | 100009941 | Model | Mammal             |
| Balaenoptera acutorostrata scammoni | 103004696 | Model | Mammal             |
| Physeter catodon                    | NA        |       | Mammal             |
| Orcinus orca                        | 101270975 | Model | Mammal             |
| Tursiops truncatus                  | 101319470 | Model | Mammal             |
| Alligator mississippiensis          | 106737134 | Model | Reptile            |
| Gavialis gangeticus                 | 109302796 | Model | Reptile            |
| Chelonia mydas                      | 102932666 | Model | Reptile            |
| Xenopus tropicalis                  | 100486886 | Model | Amphibian          |
| Nanorana parkeri                    | 108792678 | Model | Amphibian          |
| Gallus gallus                       | 427993    | Model | Bird               |
| Columba Livia                       | 102099046 | Model | Bird               |
| Coturnix japonica                   | 107324825 | Model | Bird               |
| Numida meleagris                    | NA        |       | Bird               |
| Danio rerio                         | 568868    | Model | Bony fish          |
| Cyprinodon variegatus               | 107090101 | Model | Bony fish          |
| Poecilia formosa                    | 103140382 | Model | Bony fish          |
| Oncorhynchus mykiss                 | 110495483 | Model | Bony fish          |
| Callorhynchus Milii                 | NA        |       | Cartilaginous fish |
| Salmo salar                         | NA        |       | Bony fish          |
| Cyprinus carpio                     | NA        |       | Bony fish          |
| Labrus bergylta                     | NA        |       | Bony fish          |

|                        |
|------------------------|
| <b>IL1R10/IL1RAPL2</b> |
|------------------------|

|                                     |           |           |         |
|-------------------------------------|-----------|-----------|---------|
| Homo sapiens                        | 300277    | Reviewed  | Mammal  |
| Macaca fascicularis                 | 102139365 | Model     | Mammal  |
| Bos taurus                          | 523444    | Model     | Mammal  |
| Rattus norvegicus                   | 1561761   | Model     | Mammal  |
| Canis lupus familiaris              | NA        |           | Mammal  |
| Equus caballus                      | NA        |           | Mammal  |
| Mus musculus                        | 60367     | Validated | Mammal  |
| Sus scrofa                          | 100157100 | Model     | Mammal  |
| Ovis Aries                          | 101101957 | Model     | Mammal  |
| Felis catus                         | 101100037 | Model     | Mammal  |
| Ornithorhynchus anatinus            | 100082564 | Model     | Mammal  |
| Sarcophilus harrisii                | 100929692 | Model     | Mammal  |
| Monodelphis domestica               | 100009903 | Model     | Mammal  |
| Balaenoptera acutorostrata scammoni | 103020523 | Model     | Mammal  |
| Physeter catodon                    | 102973597 | Model     | Mammal  |
| Orcinus orca                        | 101271660 | Model     | Mammal  |
| Tursiops truncatus                  | 101335027 | Model     | Mammal  |
| Alligator mississippiensis          | 102568377 | Model     | Reptile |
| Gavialis gangeticus                 | 109300794 | Model     | Reptile |
| Chelonia mydas                      | 102934844 | Model     | Reptile |

|                       |           |             |                    |
|-----------------------|-----------|-------------|--------------------|
| Xenopus tropicalis    | 779820    | Model       | Amphibian          |
| Nanorana parkeri      | 108788660 | Model       | Amphibian          |
| Gallus gallus         | 422379    | Model       | Bird               |
| Columba Livia         | 102088910 | Model       | Bird               |
| Coturnix japonica     | 107312960 | Model       | Bird               |
| Numida meleagris      | 110403365 | Model       | Bird               |
| Danio rerio           | 100149452 | Provisional | Bony fish          |
| Cyprinodon variegatus | NA        | Model       | Bony fish          |
| Poecilia formosa      | NA        | Model       | Bony fish          |
| Oncorhynchus mykiss   | NA        | Model       | Bony fish          |
| Callorhynchus Milii   | 103179448 | Model       | Cartilaginous fish |
| Salmo salar           | NA        | Model       | Bony fish          |
| Cyprinus carpio       | NA        | Model       | Bony fish          |
| Labrus bergylta       | NA        | Model       | Bony fish          |

### IL18BP

|                                     |           |       |                    |
|-------------------------------------|-----------|-------|--------------------|
| Homo sapiens                        | 10068     | Model | Mammal             |
| Macaca fascicularis                 | 107126419 | Model | Mammal             |
| Bos taurus                          | 617470    | Model | Mammal             |
| Rattus norvegicus                   | 620042    | Model | Mammal             |
| Canis lupus familiaris              | 476818    | Model | Mammal             |
| Equus caballus                      | 100066161 | Model | Mammal             |
| Mus musculus                        | 16068     | Model | Mammal             |
| Sus scrofa                          | 100525765 | Model | Mammal             |
| Ovis Aries                          | 101118983 | Model | Mammal             |
| Felis catus                         | 101096599 | Model | Mammal             |
| Ornithorhynchus anatinus            | NA        |       | Mammal             |
| Sarcophilus harrisii                | NA        |       | Mammal             |
| Monodelphis domestica               | 103102783 | Model | Mammal             |
| Balaenoptera acutorostrata scammoni | 103019816 | Model | Mammal             |
| Physeter catodon                    | 102995238 | Model | Mammal             |
| Orcinus orca                        | 101272128 | Model | Mammal             |
| Tursiops truncatus                  | 101332181 | Model | Mammal             |
| Alligator mississippiensis          | NA        |       | Reptile            |
| Gavialis gangeticus                 | NA        |       | Reptile            |
| Chelonia mydas                      | 102945076 | Model | Reptile            |
| Xenopus tropicalis                  | NA        |       | Amphibian          |
| Nanorana parkeri                    | NA        |       | Amphibian          |
| Gallus gallus                       | 107052452 | Model | Bird               |
| Columba Livia                       | NA        |       | Bird               |
| Coturnix japonica                   | 107308522 | Model | Bird               |
| Numida meleagris                    | NA        |       | Bird               |
| Danio rerio                         | NA        |       | Bony fish          |
| Cyprinodon variegatus               | NA        |       | Bony fish          |
| Poecilia formosa                    | NA        |       | Bony fish          |
| Oncorhynchus mykiss                 | NA        |       | Bony fish          |
| Callorhynchus Milii                 | NA        |       | Cartilaginous fish |
| Salmo salar                         | 106567866 | Model | Bony fish          |
| Cyprinus carpio                     | NA        |       | Bony fish          |
| Labrus bergylta                     | NA        |       | Bony fish          |
